# Supplementary material
Source: PubMed Central journal article supplement (PMC3234314)
Supplement: 11693_2011_9088_MOESM1_ESM.pdf [file 11693_2011_9088_MOESM1_ESM.pdf]

**Supplementary File- 1****A systems view of the protein expression process**

Sucheta Gokhale, Dimpal Nyayanit and Chetan Gadgil

Chemical Engineering Division, National Chemical Laboratory, CSIR, Pune 411008, India

Correspondence to:

Chetan Gadgil, Chemical Engineering Division, National Chemical Laboratory, CSIR, Pune 411008, India

Phone: 91-20-25902163

Fax: 91-20-25902612

Email: [cj.gadgil@ncl.res.in](mailto:cj.gadgil@ncl.res.in)

Table contains some details of mathematical models included in the review. Modeling approach states whether the model is deterministic or stochastic, discrete or continuous, and analyzed at steady state or the kinetics is studied. The output column lists the major finding of the study.

| Process                                       | Model                              | Modeling approach                             | Processes considered                                                                | Output                                                                                                                                               |
|-----------------------------------------------|------------------------------------|-----------------------------------------------|-------------------------------------------------------------------------------------|------------------------------------------------------------------------------------------------------------------------------------------------------|
| Chromatin remodeling and histone modification | Blossey and Schiessel 2008         | Deterministic/<br>Continuous/<br>Steady state | Histone tail modification                                                           | A quantitative model to test the role of histone tail modification in kinetic proofreading of gene activation                                        |
|                                               | Kuli and Schiessel 2003            | Deterministic/<br>Discrete/<br>Equilibrium    | Nucleosome sliding                                                                  | Estimation of mobility of nucleosomes as function of thermal motion of DNA and underlying base pair sequence                                         |
|                                               | Chou 2007                          | Stochastic/<br>Discrete/<br>Kinetic           | Histone sliding and unwrapping                                                      | Calculation of mean histone detachment time and mean detachment distance as a function of remodeler motor speed                                      |
|                                               | Boeger, Griesenbeck et al. 2008    | Stochastic/<br>Discrete/<br>Kinetic           | Nucleosome sliding                                                                  | Identification of nucleosome disassembly to be a rate limiting step, particularly for PHO5 promoter                                                  |
|                                               | Raj, Peskin et al. 2006            | Stochastic/<br>Discrete/<br>Kinetic           | Gene activation and inactivation                                                    | Statistical properties of transcriptional burst and effect of gene activation kinetics of burst size and frequency                                   |
|                                               | Kim H. D and O'Shea E.K 2008       | Deterministic/<br>Continuous/<br>Kinetic      | Nucleosome association, dissociation and gene activation PHO5 gene                  | Relationship between transcription factor affinity for DNA and gene expression                                                                       |
|                                               | Luca Mariani 2010                  | Stochastic/<br>Discrete/<br>Kinetic           | Gene opening and closing for il4 gene                                               | Study of cell to cell variability as a result of stochastic gene opening and closing events                                                          |
|                                               | Narula J., Smith A. M. et al. 2010 | Deterministic/<br>Continuous/<br>Kinetic      | Enhancement in gene expression particularly for Scl-Gata2-Fli1 triad network module | Study of steady state and transient of components in the triad, effect of mutation in the regulatory region on the components of this network module |
|                                               | Sedighi M. and Sengupta A. M 2008  | Stochastic/<br>Continuous/<br>Steady state    | Positive feedback by chromatin remodeling proteins                                  | Study of effect of change in chromatin silencing on stability of chromatin state                                                                     |
| Transcription                                 | Young, Ramirez et al. 1997         | Deterministic/<br>Continuous/<br>Kinetic      | mRNA synthesis                                                                      | Prediction of optimal conditions for in vitro mRNA synthesis, in terms of NTP and Mg ion concentration                                               |
|                                               | Arnold, Siemann et al. 2001        | Deterministic/<br>Continuous/<br>Kinetic      | Initiation and elongation                                                           | Study of effect of RNA polymerase, promoter and nucleotide concentration on mRNA synthesis rate                                                      |
|                                               | Bai, Shundrovsky et al. 2004       | Deterministic/<br>Discrete/<br>Equilibrium    | Elongation                                                                          | Prediction of back-tracking and pauses during transcription depending upon the sequence information                                                  |
|                                               | Höfer and Malte 2005               | Stochastic/<br>Discrete/<br>Steady state      | Initiation                                                                          | Study of effect of kinetics of PIC assembly on mRNA noise                                                                                            |
|                                               | Yamada and Peskin 2009             | Deterministic/<br>Discrete/<br>Kinetic        | Elongation with look-ahead feature of polymerase                                    | Estimation of window size for RNA polymerase                                                                                                         |
|                                               | Roussel and Zhu 2006               | Stochastic/<br>Discrete/<br>Kinetic           | Elongation                                                                          | Identification of probability distribution of transcriptional delay and elongation rate                                                              |
|                                               | Voliotis, Cohen et al. 2008        | Stochastic/<br>Discrete/<br>Steady state      | Initiation and elongation                                                           | Analytical expression for transcription time                                                                                                         |
|                                               | Tripathi and Chowdhury 2008b, a    | Stochastic/<br>Discrete/<br>Kinetic           | Elongation with RNA polymerase traffic                                              | Identification of mRNA synthesis rate and RNA polymerase average density                                                                             |

|                                |                                    |                                                              |                                                                          |                                                                                                                              |
|--------------------------------|------------------------------------|--------------------------------------------------------------|--------------------------------------------------------------------------|------------------------------------------------------------------------------------------------------------------------------|
|                                | von Hippel and Yager 1991          | Deterministic/<br>Continuous/<br>Equilibrium                 | Elongation and termination                                               | Prediction of elongation and termination phases during transcription depending upon sequence information                     |
|                                | von Hippel and Yager 1992          | Deterministic/<br>Continuous/<br>Equilibrium                 | Elongation and termination                                               | Prediction of elongation, back-tracking and termination efficiency                                                           |
|                                | von Hippel 1998                    | Deterministic/<br>Continuous/<br>Equilibrium                 | Elongation, termination and editing                                      | Prediction of control at any template site and error correction                                                              |
|                                | Guajardo and Sousa 1997            | Deterministic/<br>Continuous/<br>Equilibrium                 | Elongation                                                               | Identification of force generation by polymerase translocation as a function of energy available from NTP binding            |
|                                | Vasisht 2006                       | Stochastic/<br>Continuous/<br>Equilibrium                    | Elongation                                                               | Prediction of polymerase pause and back-tracking                                                                             |
|                                | Konishi 2005                       | Deterministic/<br>Continuous/<br>Equilibrium                 | mRNA synthesis and degradation                                           | General relation between transcript level produced by sequence specific interaction between DNA and protein factors          |
|                                | Kugel and Goodrich 2000            | Deterministic/<br>Continuous/<br>Kinetic                     | Initiation specific at AdMLP                                             | Identification of promoter escape to be a rate limiting step in transcription initiation                                     |
|                                | Samuel Bernard 2006                | Deterministic/<br>Continuous/<br>Kinetic                     | Transcription regulation with feedback for Hes1 transcription factor     | Mathematical model transcriptional regulation by feedback loop, which shows oscillations in Hes1 expression                  |
|                                | Rajala T., Hakkinen A. et al. 2010 | Stochastic/<br>Discrete/<br>Kinetic                          | Initiation, elongation with pausing, editing, termination                | Relation between RNA polymerase pausing and transcriptional dynamics in terms of interval between successive mRNA production |
| RNA processing and degradation | Singh, Yang et al. 2007            | Deterministic/<br>Continuous/<br>Kinetic                     | Transcription, pre-mRNA splicing, pre-mRNA turnover and mRNA degradation | Quantitative model with identification of reaction rate parameters for steps in RNA processing                               |
|                                | Ciocchetta, Hillston et al. 2008   | Stochastic/<br>Discrete/<br>Kinetic                          | Co-transcriptional cleavage and alternate splicing                       | Determination of relative frequency of alternate splicing pathways                                                           |
|                                | Cao and Parker 2001                | Deterministic/<br>Continuous/<br>Kinetic                     | mRNA synthesis and degradation                                           | Study of effect of degradation reaction rate parameters on mRNA level                                                        |
|                                | Carrier and Keasling 1997          | Stochastic/<br>Discrete/<br>Kinetic                          | Degradation by endonuclease and protection by ribosomes                  | Study of effect of 3 different mechanisms of degradation in relation to ribosome loading and translation rate                |
|                                | Khanin and Higham 2007             | Deterministic/<br>Continuous/<br>Steady state                | miRNA mediated post transcriptional regulation                           | Study of effect of presence of miRNA on target mRNA level                                                                    |
|                                | Levine, Ben Jacob et al. 2007      | Deterministic/<br>Continuous/<br>Steady state                | sRNA mediated post transcriptional regulation                            | Study of effect of presence of sRNA on target protein level                                                                  |
|                                | Aguda, Kim et al. 2008             | Deterministic/<br>Continuous/<br>Kinetic                     | miRNA mediated post transcriptional regulation in feedback               | Occurrence of oscillations in target protein level due to presence of negative feedback                                      |
| Translation                    | von Heijne, Nilsson et al. 1978    | Deterministic/<br>Continuous/<br>Kinetic                     | Initiation, Elongation and Termination                                   | Study of effect of the ribosome movement and RNA secondary structure on the elongation rate.                                 |
|                                | Bergmann and Lodish 1979           | Deterministic/<br>Continuous/<br>Steady state                | Initiation, Elongation and Termination                                   | Relationship between polysome size and protein synthesis.                                                                    |
|                                | Heinrich and Rapoport 1980         | Deterministic/<br>Continuous/<br>Kinetic                     | Initiation, Elongation, Termination                                      | Identification of elongation to be an important regulatory step in translation; effect of ribosome concentration on mRNA     |
|                                | Dimelow and Wilkinson 2009         | Deterministic/<br>Continuous/<br>Steady state                | Initiation                                                               | Distribution of the rate parameters in initiation.                                                                           |
|                                | You, Coghill et al. 2010           | Deterministic and stochastic/<br>Continuous/<br>Steady state | Initiation                                                               | Effect on initiation factor concentration on protein synthesis rate and variation of protein synthesis rate in population    |
|                                | Skjondal-Bar and Morris 2007       | Deterministic/<br>Continuous/<br>Kinetic                     | Initiation and elongation                                                | Relationship between amino acids, tRNA and other factors. Ribosomal density on RNA.                                          |

|                        |                                              |                                                       |                                                  |                                                                                                                                                           |
|------------------------|----------------------------------------------|-------------------------------------------------------|--------------------------------------------------|-----------------------------------------------------------------------------------------------------------------------------------------------------------|
|                        | Gilchrist and Wagner 2006                    | Stochastic/<br>Discrete and<br>Continuous/<br>Kinetic | Initiation, Elongation,<br>Termination           | Study of effect of nonsense errors at any codon on capability of ribosome recycling                                                                       |
|                        | Drew 2001                                    | Stochastic/<br>Discrete/<br>Steady state              | Initiation, elongation and<br>termination        | Study of effect of binding of regulator to DNA on protein synthesis                                                                                       |
|                        | Heyd and Drew 2003                           | Stochastic/<br>Discrete/<br>Steady state              | Elongation                                       | Study of effect of concentration of amino acids and elongation factors on elongation rate                                                                 |
|                        | Nayak S. ,<br>Siddiqui J.K. et al.<br>2011   | Deterministic/<br>Continuous/<br>Kinetic              | Initiation                                       | Detailed model of translation initiation; effect of regulation at translation initiation on protein output                                                |
|                        | Zouridis and<br>Hatzimanikatis<br>2007       | Deterministic/<br>Continuous/<br>Steady state         | Initiation ,Elongation(in<br>detail),Termination | Study of effect of polysome size and distribution of ribosome along mRNA on protein synthesis rate                                                        |
|                        | Bar N.S. 2009                                | Deterministic/<br>Continuous/<br>Dynamic              | Initiation                                       | Study of effect of regulation by eIF2 on translation initiation rate                                                                                      |
|                        | De Silvaa E.,<br>Krishnana J. et<br>al. 2010 | Deterministic/<br>Continuous/<br>Steady state         | Termination                                      | Mathematical model of feedback regulation of translation termination by termination factors; the effect of premature stop codon on termination regulation |
| Protein<br>degradation | Holzhtütter and<br>Kloetzel 2000             | Deterministic/<br>Continuous/<br>Kinetic              | Protein degradation                              | Protein fragment pattern by proteasomal cleavage                                                                                                          |
|                        | Peters, Janek et<br>al. 2002                 | Deterministic/<br>Continuous/<br>Kinetic              | Proteasome mediated<br>degradation               | Dynamics of protein fragment generation                                                                                                                   |
|                        | Luciani, Kesmir et<br>al. 2005               | Deterministic/<br>Continuous/<br>Kinetic              | Proteasome mediated<br>degradation               | Study of effect of proteosomal gate size on protein degradation.                                                                                          |
|                        | Lee J., Choi K. et<br>al. 2010               | Deterministic/<br>Continuous/<br>Kinetic              | Ubiquitination of NF- $\kappa$ B                 | Study of effect of ubiquitination of NF- $\kappa$ B activation; effect of mutant NF- $\kappa$ B on ubiquitination                                         |
